# Supplementary material for: Shape Evolution in Two Acts: Morphological Diversity of Larval and Adult Neoaustraranan Frogs
Source: MDPI journal article supplement (doi:10.3390/ani14101406), 2024-05-08
Supplement: s1 [file s1]

**Table S2.** Procrustes ANOVA of larval shape variation to explore the effect of genus, family, ecomorphological guild, and developmental stage as factors.

|                                                         | df  | SS      | MS    | Rsq          | F     | Z      | p-value         |
|---------------------------------------------------------|-----|---------|-------|--------------|-------|--------|-----------------|
| <i>Tadpole' shape ~ Gosner * family</i>                 |     |         |       |              |       |        |                 |
| Gosner                                                  | 2   | 0.017   | 0.009 | 0.008        | 0.51  | -0.49  | 0.67            |
| Family                                                  | 3   | 0.496   | 0.165 | <b>0.219</b> | 98.14 | 39.72  | <b>&lt;0.01</b> |
| Gosner: Family                                          | 6   | 0.071   | 0.012 | 0.031        | 0.70  | -0.54  | 0.70            |
| Residuals                                               | 100 | 168.458 | 0.017 | 0.742        |       |        |                 |
| Total                                                   | 111 | 226.889 |       |              |       |        |                 |
| <i>Tadpole' shape ~ Gosner * genus</i>                  |     |         |       |              |       |        |                 |
| Gosner                                                  | 2   | 0.017   | 0.009 | 0.008        | 0.63  | -0.23  | 0.59            |
| Genus                                                   | 12  | 102.129 | 0.085 | <b>0.450</b> | 62.19 | 46.96  | <b>&lt;0.01</b> |
| Gosner: Genus                                           | 14  | 0.094   | 0.007 | 0.042        | 0.49  | -17.70 | 0.96            |
| Residuals                                               | 83  | 113.593 | 0.014 | 0.501        |       |        |                 |
| Total                                                   | 111 | 226.889 |       |              |       |        |                 |
| <i>Tadpole' shape ~ Gosner * ecomorphological guild</i> |     |         |       |              |       |        |                 |
| Gosner                                                  | 2   | 0.017   | 0.009 | 0.008        | 0.50  | -0.53  | 0.69            |
| Guild                                                   | 3   | 0.439   | 0.146 | <b>0.193</b> | 84.20 | 38.40  | <b>&lt;0.01</b> |
| Gosner: Guild                                           | 5   | 0.058   | 0.012 | 0.026        | 0.67  | -0.59  | 0.72            |
| Residuals                                               | 101 | 175.489 | 0.017 | 0.773        |       |        |                 |
| Total                                                   | 111 | 226.889 |       |              |       |        |                 |
