# Supplementary material for: Shape Evolution in Two Acts: Morphological Diversity of Larval and Adult Neoaustraranan Frogs
Source: MDPI journal article supplement (doi:10.3390/ani14101406), 2024-05-08
Supplement: s1 [file s1]

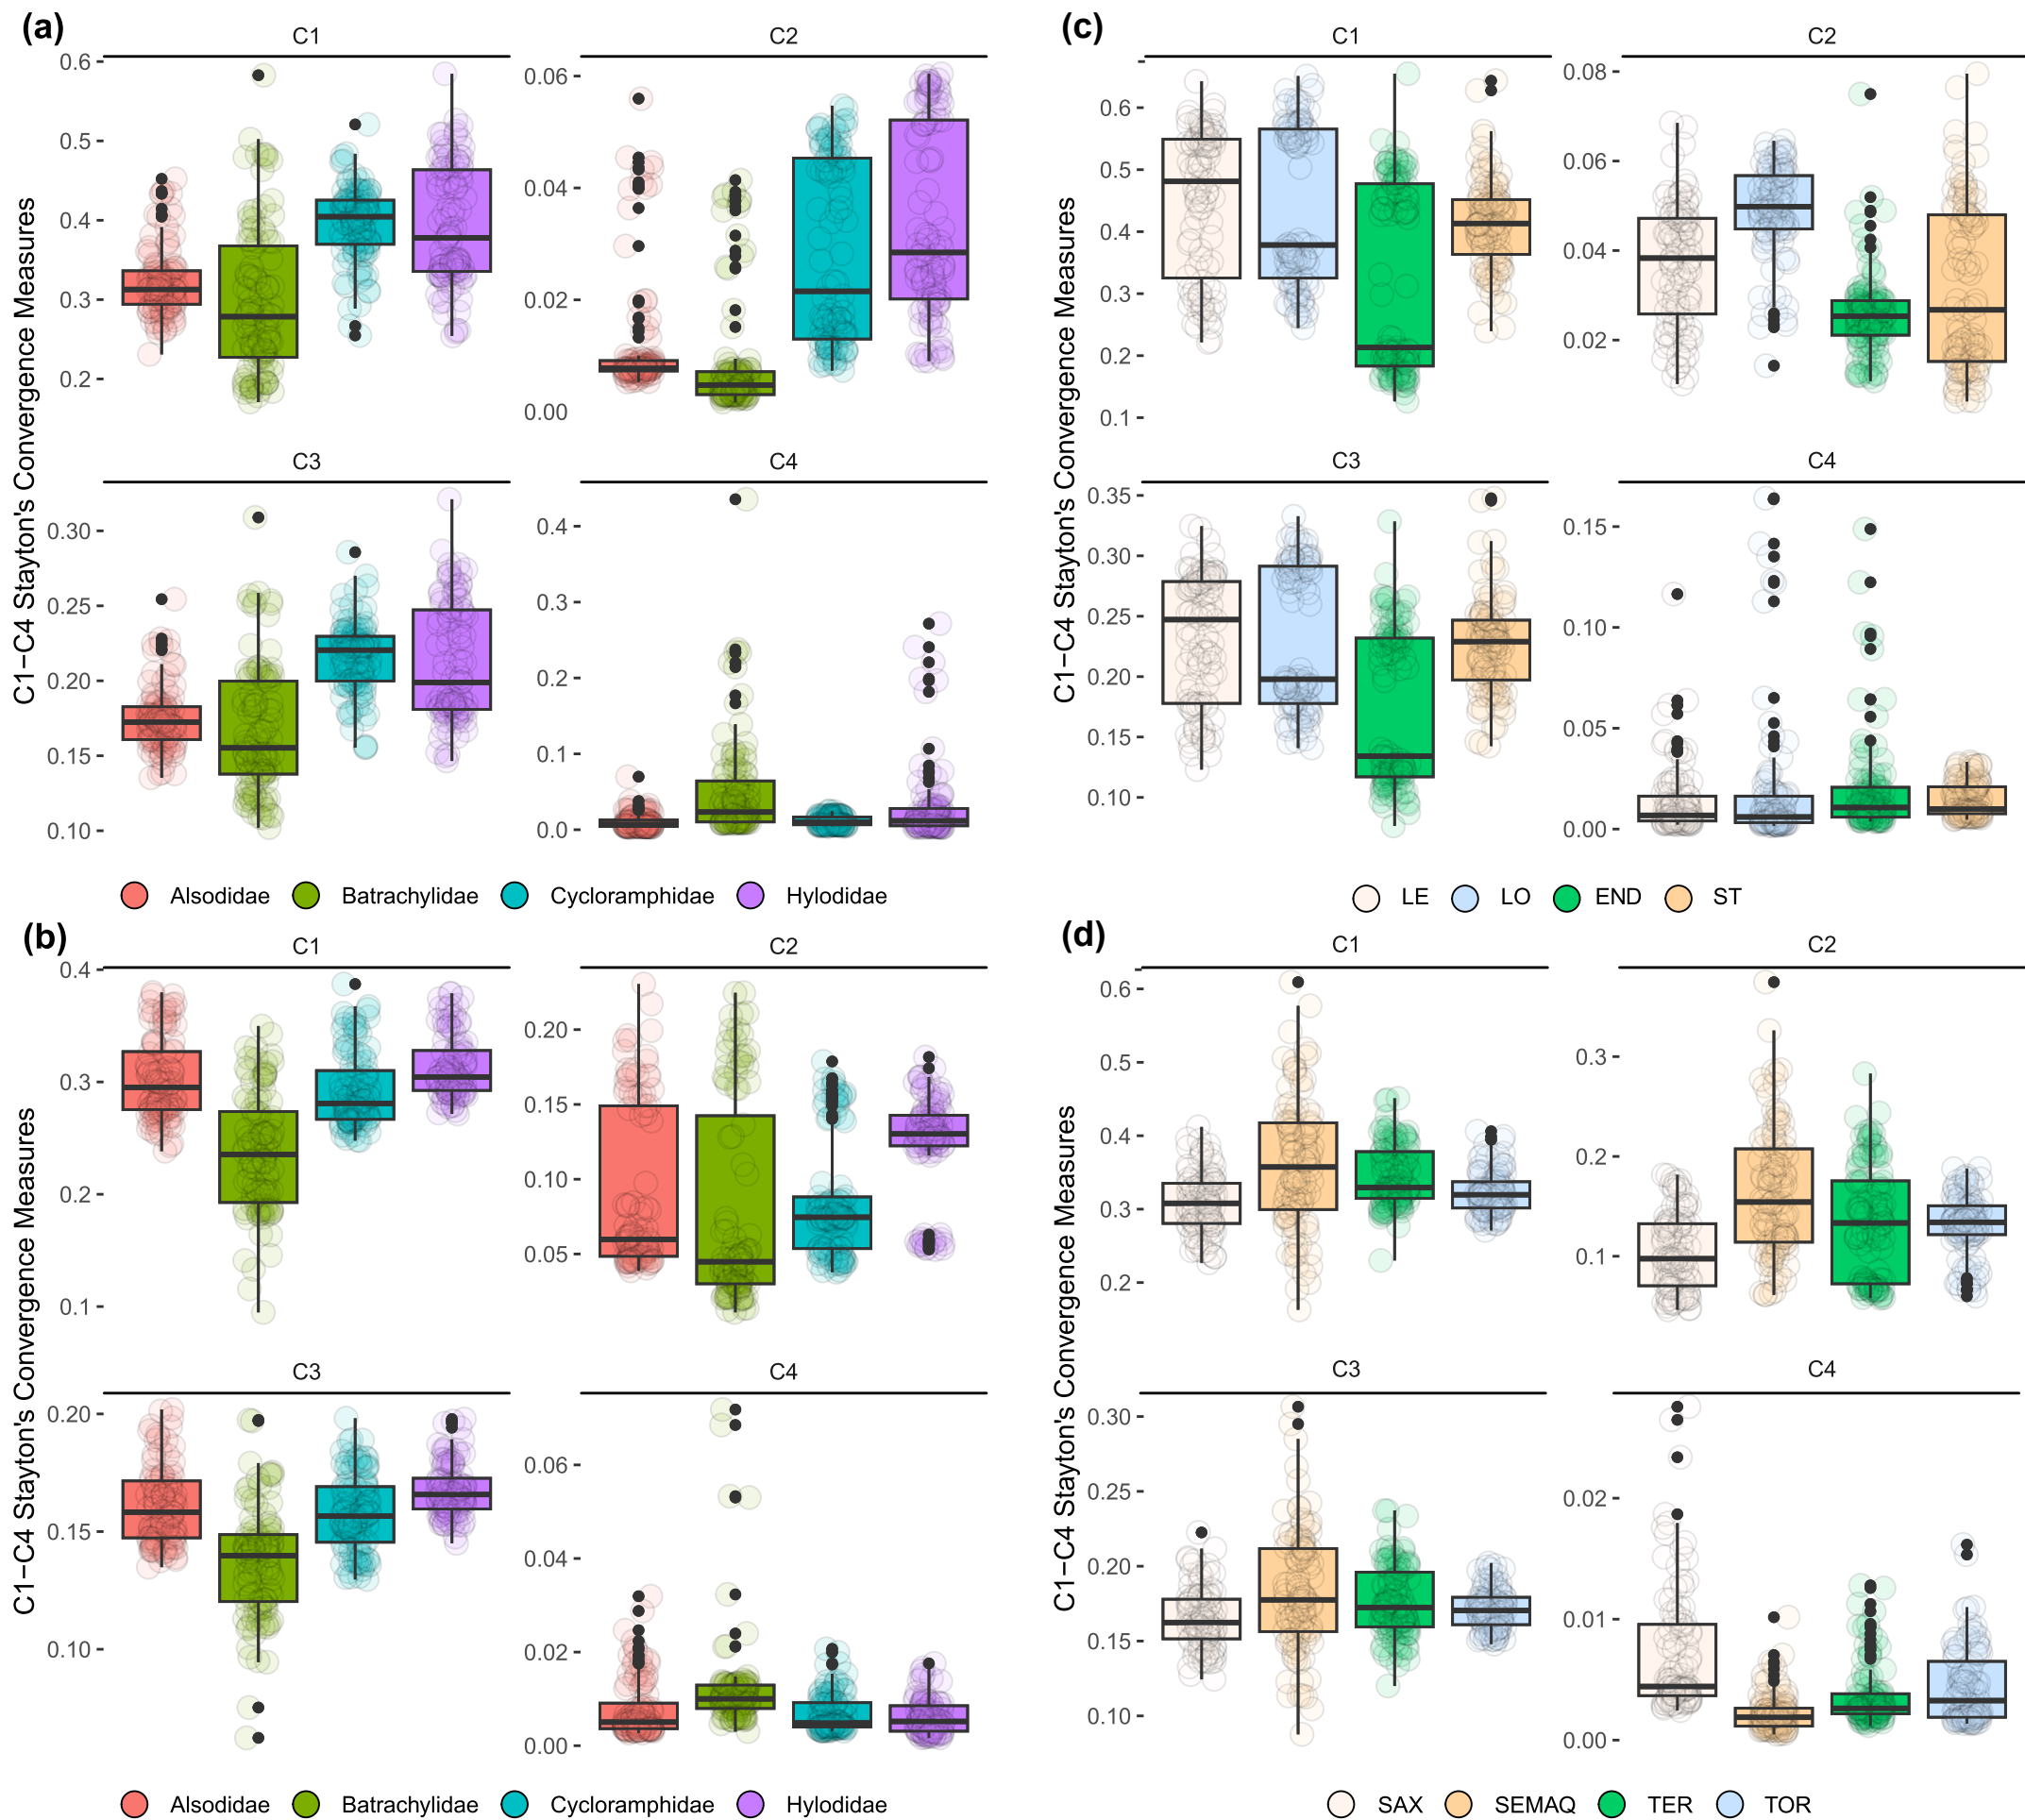

**Figure S5.** Uncertainty of shape convergence in neoaustraranan tadpoles **(a, c)** and adults **(b, d)**, assessed by Stayton's C1-C4 values. LE lentic, LO lotic, END endotrophic, ST semiterrestrial, SAX saxicolous, SEMAQ semi-aquatic, TER terrestrial, TOR torrential.
