# Supplementary material for: Shape Evolution in Two Acts: Morphological Diversity of Larval and Adult Neoaustraranan Frogs
Source: MDPI journal article supplement (doi:10.3390/ani14101406), 2024-05-08
Supplement: s1 [file s1]

**Table S3.** Statistics and sample size from the test for allometry for each family, under the null hypothesis of isometry

|                                   | <i>N</i> | % <b>predicted</b> | <i>p-value</i> |
|-----------------------------------|----------|--------------------|----------------|
| <i>Tadpoles (shape ~ log(TL))</i> |          |                    |                |
| Alsodidae                         | 30       | 21.19              | <0.01          |
| Batrachylidae                     | 11       | 12.19              | 0.27           |
| Cycloramphidae                    | 26       | 12.32              | 0.04           |
| Hylodidae                         | 45       | 6.70               | 0.03           |
| <i>Adults (shape ~ log(SVL))</i>  |          |                    |                |
| Alsodidae                         | 30       | 10.25              | 0.06           |
| Batrachylidae                     | 11       | 36.19              | <0.01          |
| Cycloramphidae                    | 26       | 5.86               | 0.34           |
| Hylodidae                         | 45       | 12.10              | 0.01           |

<sup>1</sup> TL: total length; <sup>2</sup> SVL: snout-vent length; *N*: number of individuals by family.
