# Supplementary material for: Shape Evolution in Two Acts: Morphological Diversity of Larval and Adult Neoaustraranan Frogs
Source: MDPI journal article supplement (doi:10.3390/ani14101406), 2024-05-08
Supplement: s1 [file s1]

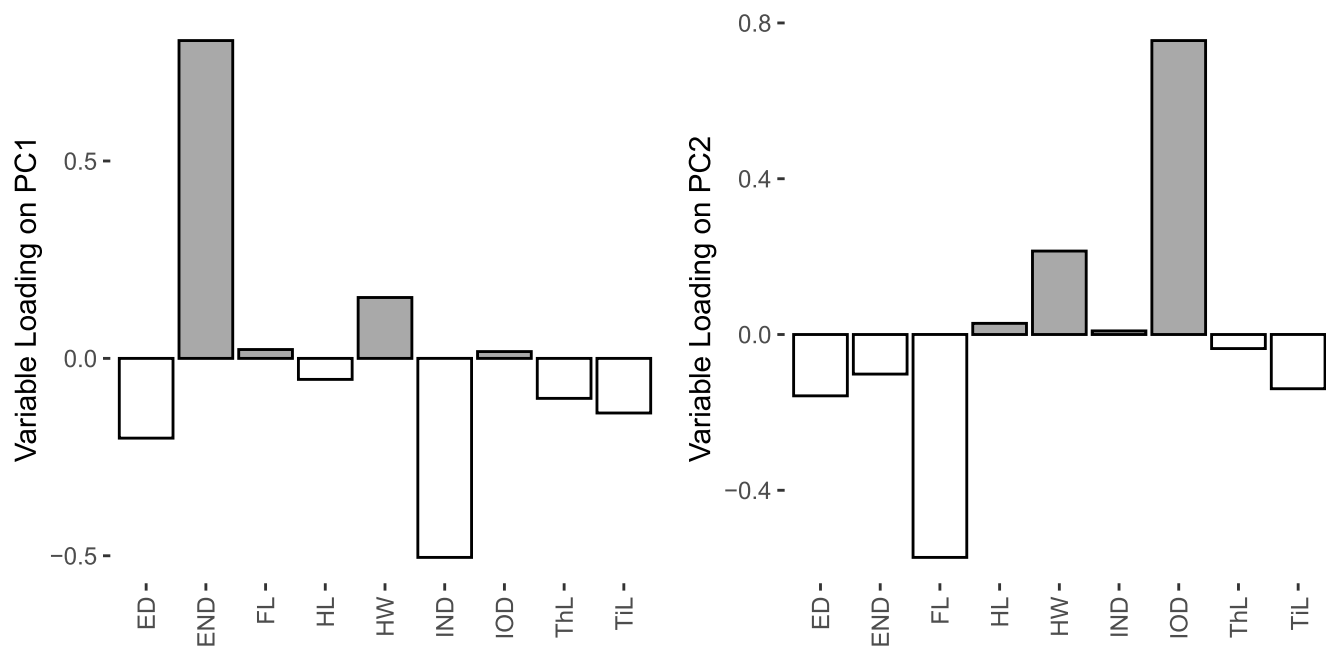

**Figure S3.** Linear measurements registered in adult frogs and their correlations with principal components 1 and 2 of PC analysis. Linear measurements: ED eye diameter, END eye–nostril distance, HL head length, HW head width, IND internarial distance, IOD interorbital distance, FL foot length, SVL snout–vent length, ThL thigh length, TiL tibia length.
