# Supplementary material for: Shape Evolution in Two Acts: Morphological Diversity of Larval and Adult Neoaustraranan Frogs
Source: MDPI journal article supplement (doi:10.3390/ani14101406), 2024-05-08
Supplement: s1 [file s1]

**Table S1.** List of species and data sources used for the present study. Species were classified taxonomically (Genus, Family) and according to larval functional groups (Guild) and adults (Ecomorph). For geometric morphometrics, we indicate which tadpoles were photographed (Voucher) and images obtained from the literature; for obtaining linear measurements, we indicate animals photographed for the study (Voucher), species whose measurements were taken in ImageJ from figures of previous studies, and measurements obtained from the text/tables in these studies. References are provided afterward. LE lentic, LO lotic, END endotrophic, ST semiterrestrial, SAX saxicolous, SEMAQ semi-aquatic, TER terrestrial, TOR torrential.

| Species                              | Genus                    | Family        | Tadpoles                |                            |       | Adults                 |           |     |          | References      |
|--------------------------------------|--------------------------|---------------|-------------------------|----------------------------|-------|------------------------|-----------|-----|----------|-----------------|
|                                      |                          |               | Source: GM <sup>1</sup> | Voucher                    | Guild | Source LM <sup>2</sup> | Voucher   | Sex | Ecomorph |                 |
| <i>Alsodes barroi</i>                | <i>Alsodes</i>           | Alsodidae     | Photo                   | FML 04698.1; FML 04594     | LO    | ImageJ, figure         | -         | ?   | TER      | [1–7]           |
| <i>Alsodes coppingeri</i>            | <i>Alsodes</i>           | Alsodidae     | Literature              | -                          | LO    | ImageJ                 | LGE25458  | M   | TER      | [5,6,8]         |
| <i>Alsodes gargola</i>               | <i>Alsodes</i>           | Alsodidae     | Literature              | -                          | LE    | ImageJ, figure         | -         | M   | SEMAQ    | [3,5,9,10]      |
| <i>Alsodes hugoi</i>                 | <i>Alsodes</i>           | Alsodidae     | Literature              | -                          | LO    | ImageJ, figure         | -         | M   | TOR      | [5,11,12]       |
| <i>Alsodes igneus</i>                | <i>Alsodes</i>           | Alsodidae     | Literature              | -                          | LO    | ImageJ, figure         | -         | M   | TER      | [5,6,13]        |
| <i>Alsodes montanus</i>              | <i>Alsodes</i>           | Alsodidae     | Literature              | -                          | LO    | ImageJ, figure         | -         | M   | TOR      | [2,5,12,14–16]  |
| <i>Alsodes neuquensis</i>            | <i>Alsodes</i>           | Alsodidae     | Literature              | -                          | LE    | Literature             | -         | M   | SEMAQ    | [5,17]          |
| <i>Alsodes nodosus</i>               | <i>Alsodes</i>           | Alsodidae     | Literature              | -                          | LO    | Literature             | -         | M   | TOR      | [2,5,12,18,19]  |
| <i>Alsodes norae</i>                 | <i>Alsodes</i>           | Alsodidae     | Literature              | -                          | LO    | ImageJ, figure         | -         | M   | TER      | [6,20,21]       |
| <i>Alsodes pehuenche</i>             | <i>Alsodes</i>           | Alsodidae     | Literature              | -                          | LE    | Literature             | -         | M   | SEMAQ    | [5,17,22–24]    |
| <i>Alsodes tumultuosus</i>           | <i>Alsodes</i>           | Alsodidae     | Literature              | -                          | LO    | ImageJ, figure         | -         | F   | SEMAQ    | [2,5,12,25]     |
| <i>Alsodes valdiviensis</i>          | <i>Alsodes</i>           | Alsodidae     | Photo, literature       | LGE 25515                  | LO    | ImageJ                 | LGE 25507 | M   | TER      | [2,5,6,14,26]   |
| <i>Alsodes vanzolinii</i>            | <i>Alsodes</i>           | Alsodidae     | Literature              | -                          | LE    | ImageJ, figure         | -         | M   | TER      | [5,12,27,28]    |
| <i>Alsodes verrucosus</i>            | <i>Alsodes</i>           | Alsodidae     | Literature              | -                          | LO    | ImageJ, figure         | -         | M   | TER      | [5,6,27,29]     |
| <i>Atelognathus nitoi</i>            | <i>Atelognathus</i>      | Batrachylidae | Literature              | -                          | LE    | Literature             | -         | M   | TER      | [30–35]         |
| <i>Atelognathus patagonicus</i>      | <i>Atelognathus</i>      | Batrachylidae | Photo, literature       | LGE 21732                  | LE    | ImageJ                 | FML2907-3 | ?   | SEMAQ    | [3,23,36–38]    |
| <i>Atelognathus reverberii</i>       | <i>Atelognathus</i>      | Batrachylidae | Photo, literature       | FML 04592                  | LE    | ImageJ                 | FML2976   | ?   | TER      | [3,23,37,39]    |
| <i>Batrachyla antartandica</i>       | <i>Batrachyla</i>        | Batrachylidae | Literature              | -                          | LE    | Literature             | -         | ?   | TER      | [6,34,37,40,41] |
| <i>Batrachyla leptopus</i>           | <i>Batrachyla</i>        | Batrachylidae | Literature              | -                          | LE    | ImageJ, figure         | -         | M   | TER      | [6,34,37,40,42] |
| <i>Batrachyla taeniata</i>           | <i>Batrachyla</i>        | Batrachylidae | Literature              | -                          | LE    | ImageJ                 | FML2797   | ?   | TER      | [6,34,37,40,43] |
| <i>Chaltenobatrachus grandisonae</i> | <i>Chaltenobatrachus</i> | Batrachylidae | Literature              | -                          | LE    | Literature             | -         | M   | SEMAQ    | [6,44]          |
| <i>Crossodactylus caramaschii</i>    | <i>Crossodactylus</i>    | Hylodidae     | Photo, literature       | DZSJRP 946.2               | LO    | ImageJ, figure         | -         | M   | SEMAQ    | [45–47]         |
| <i>Crossodactylus cyclopinus</i>     | <i>Crossodactylus</i>    | Hylodidae     | Literature              | -                          | LO    | Literature             | -         | M   | TOR      | [46,48]         |
| <i>Crossodactylus gaudichaudii</i>   | <i>Crossodactylus</i>    | Hylodidae     | Literature              | -                          | LE    | ImageJ                 | USNM15481 | M   | TOR      | [3,46,49–53]    |
| <i>Crossodactylus schmidtii</i>      | <i>Crossodactylus</i>    | Hylodidae     | Photo                   | LGE 9710; MTR II H 218 265 | LO    | Literature             | -         | M   | TOR      | [3,46,54–56]    |
| <i>Crossodactylus timbuhy</i>        | <i>Crossodactylus</i>    | Hylodidae     | Literature              | -                          | LE    | Literature             | -         | M   | SEMAQ    | [46,57]         |
| <i>Crossodactylus trachystomus</i>   | <i>Crossodactylus</i>    | Hylodidae     | Photo, literature       | DZSJRP 2415.4              | LO    | Literature             | -         | M   | TOR      | [46,50,58–62]   |

|                                       |                       |                |                   |                              |     |                |             |   |       |                     |
|---------------------------------------|-----------------------|----------------|-------------------|------------------------------|-----|----------------|-------------|---|-------|---------------------|
| <i>Crossodactylus werneri</i>         | <i>Crossodactylus</i> | Hylodidae      | Literature        | -                            | LE  | Literature     | -           | M | TOR   | [46,57,63]          |
| <i>Cycloramphus acangatan</i>         | <i>Cycloramphus</i>   | Cycloramphidae | Photo             | ZUFABC sn                    | END | ImageJ, figure | -           | M | TER   | [64–66]             |
| <i>Cycloramphus bandeirensis</i>      | <i>Cycloramphus</i>   | Cycloramphidae | Literature        | -                            | ST  | ImageJ         | ZUEC 24101  | M | SAX   | [64,66,67]          |
| <i>Cycloramphus boraceiensis</i>      | <i>Cycloramphus</i>   | Cycloramphidae | Photo, literature | DZSJRP 2536.4; DZSJRP 2609.4 | ST  | ImageJ         | ZUEC 22734  | M | SAX   | [64,66,68–71]       |
| <i>Cycloramphus brasiliensis</i>      | <i>Cycloramphus</i>   | Cycloramphidae | Literature        | -                            | ST  | ImageJ         | CFBH22601   | M | SAX   | [64,66,68,70]       |
| <i>Cycloramphus carvalhoi</i>         | <i>Cycloramphus</i>   | Cycloramphidae | Photo, literature | ZUFABC 36                    | END | ImageJ         | UFJF692     | ? | TER   | [64,147]            |
| <i>Cycloramphus dubius</i>            | <i>Cycloramphus</i>   | Cycloramphidae | Photo             | CHRP 2742                    | ST  | ImageJ         | ZUEC 6384   | M | SAX   | [64,66]             |
| <i>Cycloramphus eleutherodactylus</i> | <i>Cycloramphus</i>   | Cycloramphidae | Photo             | ZUFABC 229                   | END | ImageJ         | MZUSP 86823 | M | TER   | [64,66,68,72]       |
| <i>Cycloramphus fuliginosus</i>       | <i>Cycloramphus</i>   | Cycloramphidae | Literature        | -                            | ST  | ImageJ         | ZUEC 20908  | M | SAX   | [3,64,66,68,70,73]  |
| <i>Cycloramphus izecksohni</i>        | <i>Cycloramphus</i>   | Cycloramphidae | Literature        | -                            | ST  | ImageJ         | CFBH 6553   | M | SAX   | [64,66,70,74]       |
| <i>Cycloramphus lutzorum</i>          | <i>Cycloramphus</i>   | Cycloramphidae | Photo, literature | DZSJRP 3050.1                | ST  | ImageJ         | ZUEC 1719   | M | SAX   | [64,70,75]          |
| <i>Cycloramphus parvulus</i>          | <i>Cycloramphus</i>   | Cycloramphidae | Photo             | MUZUSP 79453                 | END | ImageJ         | ZUEC 8073   | M | TER   | [64,147,148]        |
| <i>Cycloramphus rhyakonastes</i>      | <i>Cycloramphus</i>   | Cycloramphidae | Literature        | -                            | ST  | ImageJ         | ZUEC20139   | M | SAX   | [64,70,76]          |
| <i>Cycloramphus stejnegeri</i>        | <i>Cycloramphus</i>   | Cycloramphidae | Photo, literature | MUZUSP 58582                 | END | ImageJ         | MZUSP 53402 | M | TER   | [3,66,68,73,77,78]  |
| <i>Cycloramphus valae</i>             | <i>Cycloramphus</i>   | Cycloramphidae | Photo, literature | MZUSP 59282                  | ST  | ImageJ         | MZUSP 59274 | M | SAX   | [64,66,70,79]       |
| <i>Eupsophus altor</i>                | <i>Eupsophus</i>      | Alsodidae      | Photo, literature | LGE 25516                    | END | ImageJ         | LGE25418    | ? | TER   | [6,80]              |
| <i>Eupsophus calcaratus</i>           | <i>Eupsophus</i>      | Alsodidae      | Photo, literature | FML 15859                    | END | Literature     | -           | M | TER   | [6,81–84]           |
| <i>Eupsophus emiliopugini</i>         | <i>Eupsophus</i>      | Alsodidae      | Photo, literature | LGE 25517                    | END | ImageJ         | LGE25506    | ? | TER   | [6,82,85,86]        |
| <i>Eupsophus nahuelbutensis</i>       | <i>Eupsophus</i>      | Alsodidae      | Literature        | -                            | END | ImageJ, figure | -           | F | TER   | [6,82,87]           |
| <i>Eupsophus roseus</i>               | <i>Eupsophus</i>      | Alsodidae      | Literature        | -                            | END | ImageJ         | FML2952-3   | ? | TER   | [6,82,88]           |
| <i>Eupsophus septentrionalis</i>      | <i>Eupsophus</i>      | Alsodidae      | Literature        | -                            | END | Literature     | -           | M | TER   | [6,82,89,90]        |
| <i>Eupsophus vertebralis</i>          | <i>Eupsophus</i>      | Alsodidae      | Literature        | -                            | END | ImageJ         | FML30638    | M | TER   | [6,82,91]           |
| <i>Hylodes amnicola</i>               | <i>Hylodes</i>        | Hylodidae      | Literature        | -                            | LO  | Literature     | -           | M | SEMAQ | [92–94]             |
| <i>Hylodes asper</i>                  | <i>Hylodes</i>        | Hylodidae      | Photo             | ZUFABC DAS AFr8NotP1         | LO  | Literature     | -           | M | TOR   | [93–97]             |
| <i>Hylodes babax</i>                  | <i>Hylodes</i>        | Hylodidae      | Literature        | -                            | LO  | Literature     | -           | M | TOR   | [60,93,94,98,99]    |
| <i>Hylodes caete</i>                  | <i>Hylodes</i>        | Hylodidae      | Photo, literature | ZUFABC DAS BNa5NotP1         | LO  | Literature     | -           | M | TOR   | [93,100,101]        |
| <i>Hylodes charadraetes</i>           | <i>Hylodes</i>        | Hylodidae      | Literature        | -                            | LO  | Literature     | -           | M | TOR   | [93,94,102]         |
| <i>Hylodes dactylocinus</i>           | <i>Hylodes</i>        | Hylodidae      | Literature        | -                            | LO  | ImageJ, figure | -           | M | TOR   | [93,103–105]        |
| <i>Hylodes fredii</i>                 | <i>Hylodes</i>        | Hylodidae      | Literature        | -                            | LO  | Literature     | -           | M | SAX   | [52,53,93,94,106]   |
| <i>Hylodes heyeri</i>                 | <i>Hylodes</i>        | Hylodidae      | Photo, literature | DZSJRP 852.1                 | LO  | Literature     | -           | M | TOR   | [93,94,104,107,108] |
| <i>Hylodes japi</i>                   | <i>Hylodes</i>        | Hylodidae      | Literature        | -                            | LO  | Literature     | -           | M | TOR   | [93,109,110]        |
| <i>Hylodes magalhaesi</i>             | <i>Hylodes</i>        | Hylodidae      | Photo, literature | DZSJRP 1483.3                | LO  | ImageJ, figure | -           | M | TOR   | [93,104,111,112]    |
| <i>Hylodes meridionalis</i>           | <i>Hylodes</i>        | Hylodidae      | Literature        | -                            | LO  | Literature     | -           | M | TOR   | [93,94,104,113,114] |
| <i>Hylodes nasus</i>                  | <i>Hylodes</i>        | Hylodidae      | Literature        | -                            | LO  | Literature     | -           | M | SAX   | [93,94,109,115,116] |

|                                  |                      |                |                   |                          |    |                |                |   |       |                        |
|----------------------------------|----------------------|----------------|-------------------|--------------------------|----|----------------|----------------|---|-------|------------------------|
| <i>Hylodes ornatus</i>           | <i>Hylodes</i>       | Hylodidae      | Literature        | -                        | LO | Literature     | -              | M | TOR   | [93,94,117,118]        |
| <i>Hylodes otavioi</i>           | <i>Hylodes</i>       | Hylodidae      | Literature        | -                        | LO | Literature     | -              | M | TOR   | [93,94,119]            |
| <i>Hylodes perere</i>            | <i>Hylodes</i>       | Hylodidae      | Literature        | -                        | LO | Literature     | -              | M | TOR   | [93,120]               |
| <i>Hylodes perplicatus</i>       | <i>Hylodes</i>       | Hylodidae      | Photo, literature | DZSJRP 3035.1            | LO | Literature     | -              | M | TOR   | [93,94,121]            |
| <i>Hylodes phyllodes</i>         | <i>Hylodes</i>       | Hylodidae      | Photo, literature | DZSJRP 2563.1            | LO | Literature     | -              | M | TOR   | [69,93,94,104,122,123] |
| <i>Hylodes pipilans</i>          | <i>Hylodes</i>       | Hylodidae      | Literature        | -                        | LO | Literature     | -              | M | TOR   | [93,94,105,124,125]    |
| <i>Hylodes sazimai</i>           | <i>Hylodes</i>       | Hylodidae      | Photo, literature | DZSJRP 2339.2            | LO | Literature     | -              | M | TOR   | [93,94,104,126]        |
| <i>Hylodes uai</i>               | <i>Hylodes</i>       | Hylodidae      | Literature        | -                        | LO | Literature     | -              | M | TOR   | [60,93,94,104,127,127] |
| <i>Hylorina sylvatica</i>        | <i>Hylorina</i>      | Batrachylidae  | Photo, literature | FML 16202                | LO | ImageJ         | FML3667        | ? | SEMAQ | [34,89,128]            |
| <i>Limnomedusa macroglossa</i>   | <i>Limnomedusa</i>   | Alsodidae      | Photo, literature | FML 26369                | LO | ImageJ         | FML7009        | ? | TER   | [23,37,129,130]        |
| <i>Megaelosia goeldii</i>        | <i>Megaelosia</i>    | Hylodidae      | Photo, literature | MZUSP 36455              | LO | Literature     | -              | M | TOR   | [3,109,131–133]        |
| <i>Phantasmarana apuana</i>      | <i>Phantasmarana</i> | Hylodidae      | Photo, literature | MTR 10828                | LO | Literature     | -              | M | TOR   | [132,134]              |
| <i>Phantasmarana boticariana</i> | <i>Phantasmarana</i> | Hylodidae      | Photo             | CHRP 2826                | LO | Literature     | -              | F | TOR   | [132,135]              |
| <i>Phantasmarana jordanensis</i> | <i>Phantasmarana</i> | Hylodidae      | Literature        | -                        | LO | ImageJ, figure | -              | F | TOR   | [68,132,136,137]       |
| <i>Phantasmarana massarti</i>    | <i>Phantasmarana</i> | Hylodidae      | Photo, literature | ZUFABC DDBN 40           | LO | Literature     | -              | M | TOR   | [132,133]              |
| <i>Phantasmarana tamuia</i>      | <i>Phantasmarana</i> | Hylodidae      | Literature        | -                        | LO | Literature     | -              | M | TOR   | [138]                  |
| <i>Thoropa lutzi</i>             | <i>Thoropa</i>       | Cycloramphidae | Literature        | -                        | ST | Literature     | -              | M | SAX   | [70,139–141]           |
| <i>Thoropa megalotympanum</i>    | <i>Thoropa</i>       | Cycloramphidae | Photo, literature | DZSJRP 2416.1            | ST | ImageJ         | ZUEC 15938     | M | SAX   | [60,70,142,143]        |
| <i>Thoropa miliaris</i>          | <i>Thoropa</i>       | Cycloramphidae | Photo             | MZUSP 79966; MZUSP 79993 | ST | ImageJ         | MNRJ 24979     | M | SAX   | [52,60,70,139,143,144] |
| <i>Thoropa petropolitana</i>     | <i>Thoropa</i>       | Cycloramphidae | Photo, literature | MZUSP 79886              | ST | ImageJ         | MZUSP A-131573 | M | SAX   | [3,70,73,139,140]      |
| <i>Thoropa saxatilis</i>         | <i>Thoropa</i>       | Cycloramphidae | Literature        | -                        | ST | ImageJ, figure | -              | M | SAX   | [70,140,145]           |
| <i>Thoropa taophora</i>          | <i>Thoropa</i>       | Cycloramphidae | Literature        | -                        | ST | ImageJ, figure | -              | M | SAX   | [64,70,139,144,146]    |

<sup>1</sup> GM: geometric morphometrics; <sup>2</sup> LM: linear measurements.

## References

1. Veloso, A.; Díaz, N.; Iturra, P.; Penna, M. Descripción de Una Nueva Especie de Telmatobino Del Género Alsodes (Amphibia, Leptodactylidae) de La Cordillera de Nahuelbuta (Sur de Chile). *Medio Ambiente* **1981**, *5*, 72–77.
2. Díaz, N.F.; Valencia, J. Microhabitat Utilization by Two Leptodactylid Frogs in the Andes of Central Chile. *Oecologia* **1985**, *66*, 353–357.
3. Wassersug, R.J.; Heyer, W.R. A Survey of Internal Oral Features of Leptodactyloid Larvae (Amphibia: Anura). *Smithsonian Contributions to Zoology* **1988**, 1–99, doi:10.5479/si.00810282.457.
4. Lavilla, E.O. Estructura Del Condrocráneo y Esqueleto Visceral de Larvas de Alsodes Barrioi (Anura: Leptodactylidae). *Acta Zoologica Lilloana* **1992**, *XLII*, 13–17.

5. Barrasso, D.A.; Alcade, L.; Blotto, B.L.; Basso, N.G. Description of the Tadpole of *Alsodes Neuquensis* Cei, 1976 Published by the British Herpetological Society and Comparison with the Sibling Species *A. Gargola* Gallardo, 1970 (Amphibia, Anura, Alsodidae). *Herpetological Journal* **2016**, *26*, 21–31.
6. Charrier, A. *Guía de Campo: Anfibios de Los Bosques de La Zona Centro Sur y Patagonia de Chile*; Ed. Corporación Chilena de la Madera: Chile, 2019; ISBN 978-956-8398-12-5.
7. Flores, E.F. Ampliación Del Rango de Distribución y Nuevos Antecedentes Del Hábitat de Dos Especies de Ranas Del Género *Alsodes* Bell, 1843 (Amphibia, Anura, Alsodidae) En La Cordillera de Nahuelbuta, Sur de Chile. *Biodiversity and Natural History* **2018**, *4*, 1–7.
8. Formas, J.R.; Núñez, J.; Cuevas, C. Identidad de La Rana Austral Chilena *Eupsophus Coppingeri* (Amphibia, Anura, Neobatrachia): Evidencias Morfológicas, Cromosómicas y Moleculares. *Revista Chilena de Historia Natural* **2008**, *81*, 3–20, doi:10.4067/s0716-078x2008000100001.
9. Pillado, M.S.; Alonso, C.A.; Úbeda, C.A. La Larva de *Alsodes Gargola* Gallardo, 1970 (Leptodactylidae, Telmatobiinae). *Alytes* **2000**, *18*, 62–72.
10. Mella-Romero, J.; Jorge, M.; Muñoz, C.; Correa, C. Range Extension of Cathedral Spiny-Chest Frog, *Alsodes Gargola* Gallardo, 1970: A Record in an Unknown Road of the Chilean Patagonia. *Gayana* **2022**, *86*, 22–29.
11. Cuevas, C.C.; Formas, J.R. A New Species of *Alsodes* (Amphibia, Anura, Leptodactylidae) from Central Chile. *Amphibia-Reptilia* **2001**, *22*, 187–198.
12. Charrier, A.; Mora, M.; Correa, C.; Palma, E. *Monitoreo y Conservación de Anfibios Alto Andinos de La Región Metropolitana*; América LTDA, 2017;
13. Cuevas, C.C.; Formas, J.R. A New Frog of the Genus *Alsodes* (Leptodactylidae) from the Tolhuaca National Park, Andes Range, Southern Chile. *Amphibia Reptilia* **2005**, *26*, 39–48, doi:10.1163/1568538053693288.
14. Formas, J.R. Renacuajos Del Grupo Monticola. *Boletín de la Sociedad de Biología de Concepción* **1975**, *XLIX*, 231–237.
15. Busse, K. Zur Morphologie Und Biologie von *Telmatobius Montanus* LATASTE 1902, Nebst Beschreibung Seiner Larve (Amphibia: Leptodactylidae). *Amphibia-Reptilia* **1980**, *1*, 113–125.
16. Araya, S.; Riveros, Y.E. Ampliación Del Rango de Distribución Geográfica de *Alsodes Montanus* (Amphibia, Leptodactylidae) a La Región de O'Higgins. *Boletín Museo Nacional de Historia Natural* **2008**, *57*, 117–123, doi:10.54830/bmnhn.v57.2008.250.
17. Cei, J.M. Remarks on Some Neotropical Amphibians of the Genus *Alsodes* from Southern Argentina. *Atti della Società Italiana di Scienze Naturali e del Museo Civico di Storia Naturale di Milano* **1976**, *117*, 159–164.
18. Cei, J.M. *Batrachios de Chile*; Universidad de Chile, 1962; Vol. Vol. 1;
19. Cuevas, C. Análisis Taxonómico de *Alsodes Nodosus* (Duméril & Bibron, 1841) (Amphibia, Neobatrachia): Antecedentes Morfológicos y Moleculares. **2013**, 1–138.
20. Formas, J.R.; Cuevas, C.C. The Tadpole of *Alsodes* Cf. *Norae* (Anura: Alsodidae) with Comments on the Diagnosis of the Genus *Alsodes*. *Salamandra* **2017**, *53*, 131–136.

21. Cuevas, C. A New Species of the Genus *Alsodes* (Anura: Neobatrachia) from the Nothofagus Forest, Coastal Range, Southern Chile, Identified by Its Karyotype. *Zootaxa* **2008**, 1771, 43–53, doi:10.5281/zenodo.182136.
22. Cei, A.J.M.; Roig, V.G. The Systematic Status and Biology of *Telmatobius Montanus* Lataste (Amphibia, Leptodactylidae). *Copeia* **1965**, 1965, 421–425.
23. Kehr, A.; Williams, J. *Larvas de Anuros de La República Argentina*; Especial), C. de H. (Serie, Ed.; Asociacion Herpetologica Argentina, 1990;
24. Correa, C.; Pastenes, L.; Iturra, P.; Calderón, P.; Vásquez, D.; Lam, N.; Salinas, H.; Méndez, M.A. Confirmation of the Presence of *Alsodes Pehuenche* Cei, 1976 (Anura, Alsodidae) in Chile: Morphological, Chromosomal and Molecular Evidence. *Gayana (Concepción)* **2013**, 77, 125–131, doi:10.4067/s0717-65382013000200006.
25. Álvarez, D.R. Nueva Localidad Para *Alsodes Tumultuosus* Veloso, Iturra & Galleguillos, 1979 (Amphibia, Alsodidae) En La Cordillera de Los Andes, Region de O'Higgins, Chile. *Biodiversity and Natural History* **2015**, 1, 1–5.
26. Formas, J.R.; Cuevas, C.; Brieva, L.M. A New Species of *Alsodes* (Anura: Leptodactylidae) from Cerro Mirador, Cordillera Pelada, Southern Chile. *Proceedings of the Biological Society of Washington* **2002**, 115, 708–719.
27. Formas, J.R.; Brieva, L. The Tadpoles of *Alsodes Vanzolinii* and *A. Verrucosus* (Anura: Leptodactylidae) with Descriptions of Their Internal Oral and Chondrocranial Morphology. *Amphibia Reptilia* **2004**, 25, 151–164, doi:10.1163/1568538041231238.
28. Formas, J.R. The Identity of the Frog *Eupsophus Vanzolinii* from Ramadillas, Nahuebuta Range, Southern Chile. *Proceedings of the Biological Society of Washington* **1980**, 93, 920–927.
29. Diaz, N.F.; Nuñez, H. Nuevo Hallazgo de *Alsodes Verrucosus* (Philippi, 1902) En Chile y Descripción de Su Larva (Anura: Leptodactylidae). *Bol. Mus. Nac. Hist. Nat. Chile* **1988**, 41, 87–94.
30. Basso, N.G.; Úbeda, C.A. The Tadpole of *Atelognathus Nitoi* (Leptodactylidae, Telmatobiinae). *Alytes* **1997**, 15, 121–126.
31. Echeverría, D.D.; Úbeda, C.A.; Basso, N.G. Microscopía Electrónica de Barrido Del Aparato Bucal y Cavidad Bucofaríngea de La Larva de *Atelognathus Nitoi* (Anura, Leptodactylidae). *Alytes* **2001**, 19, 173–182.
32. Úbeda, C.A.; Basso, N.G. The Tadpole of *Atelognathus Salai* Cei, 1984 (Leptodactylidae: Telmatobiinae). *Amphibia-Reptilia* **2003**, 24, 112–118.
33. Meriggio, V.; Veloso, A.; Young, S.; Nuñez, H. *Atelognathus Jeinimenensis* n. Sp. de Leptodactylidae Para El Sur de Chile. *Boletín del Museo Nacional de Historia Natural* **2004**, 53, 99–123.
34. Grosso, J.; Barrasso, D.A.; Baldo, D.; Nuñez, J.J.; Candioti, F.V. Developmental Diversity in an Endemic Family of Patagonian Frogs (Anura: Batrachylidae). *Biological Journal of the Linnean Society* **2022**, 136, 240–263, doi:10.1093/biolinnean/blac032.
35. Úbeda, C.; Zagarese, H.; Diaz, M.; Pedrozo, F. First Steps towards the Conservation of the Microendemic Patagonian Frog *Atelognathus Nitoi*. *Oryx* **1999**, 33, 59–66, doi:10.1046/j.1365-3008.1999.00035.x.
36. Cei, J.M. The Tadpole of *Batrachophrynus Patagonicus* Gallardo. *Herpetologica* **1965**, 20, 242–245.

37. Cei, J.-M.A.M. *Amphibians of Argentina*; Università degli Studi di Firenze: Firenze, 1980; Vol. N. S. Mono;
38. Cuello, M.E.; Úbeda, C.A.; Bello, M.T. Relationship between Morphotypes of *Atelognathus Patagonicus* (Anura, Neobatrachia) and Environmental Conditions: Evidence and Possible Explanation. *Phyllomedusa* **2008**, *7*, 35–44, doi:10.11606/issn.2316-9079.v7i1p35-44.
39. Cei, J.-M.A.M. The Patagonian Telmatobiid Fauna of the Volcanic Somuncura Plateau of Argentina. *Journal of Herpetology* **1969**, *3*, 1–18.
40. Formas, J.R. Descriptions of Batrachyla (Amphibia, Anura, Leptodactylidae) Tadpoles. *Journal of Herpetology* **1976**, *10*, 221, doi:10.2307/1562983.
41. Atalah, A.; Sielfeld, W.K. Presencia de Batrachyla Antartandica Barrio En Magallanes. *Anales del Instituto de la Patagonia* **1976**, *7*, 168–170.
42. Cuevas, C.C.; Cifuentes, S.L. Amphibia, Anura, Ceratophryidae, Batrachyla Leptopus Bell, 1843: New Records Updating and Geographic Distribution Map, Chile. *Check List* **2010**, *6*, 633–636, doi:10.15560/6.4.633.
43. Cei, J.M.; Capurro, L. Biología y Desarrollo de Eupsophus Taeniatus Girard. *Investigaciones Zoológicas Chilenas* **1958**, *IV*, 159–182.
44. Basso, N.G.; Úbeda, C.A.; Bunge, M.M.; Martinazzo, L.B. A New Genus of Neobatrachian Frog from Southern Patagonian Forests, Argentina and Chile. *Zootaxa* **2011**, 31–44, doi:10.11646/zootaxa.3002.1.3.
45. Toscano, N.P.; Alecrim De Freitas, N.H.; De Rezende, M.R.C.; Provete, D.B.; Lyra, M.; Haddad, C.F.B.; Rossa-Feres, D.D.C.; Da Silva, F.R. External Morphology and Internal Oral Features of the Tadpole of *Crossodactylus Caramaschii* (Anura: Hylodidae). *Journal of Herpetology* **2019**, *53*, 263–271, doi:10.1670/18-155.
46. Lacerda, J.V.A.; Montesinos, R.; Zocca, C.; Guimarães, C.S.; Santana, D.J.; Ferreira, R.B. On the Stream-Dwelling *Crossodactylus Timbuhy* (Anura, Hylodidae): Taxonomy, Natural History, and Geographic Distribution. *Zootaxa* **2022**, *5155*, 564–580, doi:10.11646/zootaxa.5155.4.6.
47. Bastos, R.P.; Pombal, J.P.; Bastos, R.P.; Pombal, J.P. New Species of *Crossodactylus* (Anura: Leptodactylidae) from the Atlantic Rain Forest of Southeastern Brazil. *Copeia* **1995**, *1995*, 436, doi:10.2307/1446907.
48. Nascimento, L.B.; Cruz, C.A.G.; Feio, R.N. A New Species of Diurnal Frog in the Genus *Crossodactylus* Duméril and Bibron, 1841 (Anura, Leptodactylidae) from Southeastern Brazil. *Amphibia Reptilia* **2005**, *26*, 497–505, doi:10.1163/156853805774806214.
49. Francioni, E.; Carcerelli, L.C. Descrição Do Girino de *Crossodactylus Gaudichaudii* Duméril & Bibron, 1841 (Anura, Leptodactylidae). *Mem. Inst. Butantan* **1993**, *55*, 63–67.
50. Weber, L.N.; Caramaschi, U. Descrição Da Morfologia Oral Interna de Larvas Do Gênero *Crossodactylus* Duméril & Bibron, 1841 (Amphibia, Anura, Leptodactylidae). *Arquivos do Museu Nacional, Rio de Janeiro* **2006**, *64*, 141–149.
51. Silva-Soares, T.; Nogueira-Costa, P.; Júnior, V.N.T.B.; Weber, L.N.; Rocha, C.F.D. The Larva of *Crossodactylus Aeneus* Müller, 1924: Morphology and Ecological Aspects. *Herpetologica* **2015**, *71*, 46–57, doi:10.1655/HERPETOLOGICA-D-13-00048.
52. Fatorelli, P.; Nogueira-Costa, P.; Rocha, C.F.D. Characterization of Tadpoles of the Southward Portion (Oceanic Face) of Ilha Grande, Rio de Janeiro, Brazil, with a Proposal for Identification Key. *North-Western Journal of Zoology* **2018**, *14*, 171–184.

53. Almeida-Gomes, M.; Hatano, F.H.; Sluys, M.V.; Rocha, C.F.D. Diet and Microhabitat Use by Two Hylodinae Species (Anura, Cycloramphidae) Living in Sympatry and Syntopy in a Brazilian Atlantic Rainforest Area. *Iheringia. Série Zoologia* **2007**, *97*, 27–30, doi:<https://doi.org/10.1590/S0073-47212007000100005>.
54. Faivovich, J. Comments on the Larvae of the Argentine Species of the Genus. *Alytes* **1998**, *16*, 61–67.
55. Bastiani, M.V.I. de; Garcia, P.C. de A.; Lucas, E.M. Crossodactylus Schmidt Gallardo, 1961 (Anura: Hylodidae) in Santa Catarina State, Southern Brazil: A New Record and Comments on Its Conservation Status. *Check List* **2012**, *8*, 262–263.
56. Caldart, V.M.; Iop, S.; Sá, F.P. de; Rocha, M.C. da; Arruda, J.L.S. de; Santos, T.G. dos; Cechin, S.Z. New Records of Crossodactylus Schmidt Gallardo, 1961 (Anura: Hylodidae) for the State of Rio Grande Do Sul, Brazil, with Data on Morphometry and an Updated Geographic Distribution Map. *Check List* **2013**, *9*, 1552–1555.
57. Pimenta, B.V.S.; Cruz, C.A.G.; Caramaschi, U. Taxonomic Review of the Species Complex of Crossodactylus Dispar A. Lutz, 1925 (Anura, Hylodidae). *Arquivos de Zoologia* **2014**, *45*, 1–33, doi:<https://doi.org/10.11606/issn.2176-7793.v45i1p1-33>.
58. Caramaschi, U.; Kisteumarcher, G. O Girino de Crossodactylus Trachystomus (Reinhardt e Luetken, 1862) (Anura, Leptodactylidae). *Rev. Brasil. Biol.* **1989**, *49*, 237–239.
59. Caramaschi, U.; Sazima, I. Uma Nova Espécie de Crossodactylus Da Serra Do Cipó, Minas Gerais, Brasil (Amphibia, Leptodactylidae). *Revista Brasileira de Zoologia* **1985**, *3*, 43–49, doi:10.1590/s0101-81751985000100005.
60. Pezzuti, T.L.; Leite, F.S.F.; Rossa-Feres, D.D.C.; Garcia, P.C.A. The Tadpoles of the Iron Quadrangle, Southeastern Brazil: A Baseline for Larval Knowledge and Anuran Conservation in a Diverse and Threatened Region. *South American Journal of Herpetology* **2021**, *22*, 1–109, doi:10.2994/SAJH-D-20-00042.1.
61. Pimenta, B.V.S.; Wachlewski, M.; Cruz, C.A.G. Morphological and Acoustical Variation, Geographic Distribution, and Conservation Status of the Spinythumb Frog Crossodactylus Bokermanni Caramaschi and Sazima, 1985 (Anura, Hylodidae). *Journal of Herpetology* **2008**, *42*, 481–492, doi:10.1670/07-164.1.
62. Pimenta, B.V.S.; Caramaschi, U.; Cruz, C.A.G. Synonymy of Crossodactylus Bokermanni Caramaschi & Sazima, 1985 with Crossodactylus Trachystomus (Reinhardt & Lütken, 1862) and Description of a New Species from Minas Gerais, Brazil (Anura: Hylodidae). *Zootaxa* **2015**, *3955*, 65–82, doi:10.11646/zootaxa.3955.1.3.
63. Vidigal, I.; De Carvalho, T.R.; Clemente-Carvalho, R.B.G.; Giaretta, A.A. Vocalizations, Tadpole, and Natural History of Crossodactylus Werner Pimenta, Cruz & Caramaschi, 2014 (Anura: Hylodidae), with Comments on Distribution and Intraspecific Variation. *Zootaxa* **2018**, *4388*, 61–75, doi:10.11646/zootaxa.4388.1.4.
64. de Sá, F.P.; Haddad, C.F.B.; Gray, M.M.; Verdade, V.K.; Thomé, M.T.C.; Rodrigues, M.T.; Zamudio, K.R. Male-male Competition and Repeated Evolution of Terrestrial Breeding in Atlantic Coastal Forest Frogs\*. *Evolution* **2020**, *74*, 459–475, doi:10.1111/evo.13879.
65. Verdade, V.K.; Rodrigues, M.T. A New Species of Cycloramphus (Anura, Leptodactylidae) from the Atlantic Forest, Brazil. *Herpetologica* **2003**, *59*, 513–518, doi:<https://doi.org/10.1655/02-78>.
66. Verdade, V.K. Relações Filogenéticas Entre as Espécies Dos Gêneros Cycloramphus Tschudi 1838 e Zachaenus Cope 1866 (Anura, Leptodactylidae). **2005**, 241–241.
67. Verdade, V.K.; Almeida-Silva, D.; Cassimiro, J.; Rodrigues, M.T. Rediscovering Cycloramphus Bandeirensis (Anura: Cycloramphidae): Natural History and Breeding Biology of a Vulnerable Species with a Variant Reproductive Mode. *Phyllomedusa: Journal of Herpetology* **2019**, *18*, 159–175, doi:10.11606/issn.2316-9079.v18i2p159-175.

68. Heyer, W.R. Variation and Systematics of Frogs of the Genus *Cycloramphus* (Amphibia: Leptodactylidae). *Arquivos de Zoologia* **1983**, 30, 235–339.
69. Heyer, W.R.; Rand, A.S.; Cruz, C.A.G.; Peixoto, O.L.; Nelson, C.E. Frog of Boracéia. *Arquivos de Zoologia* **1990**, 31, 1–410.
70. Dias, P.H. dos S.; Vera Candioti, F.; Sabbag, A.F.; Colaço, G.; da Silva, H.R.; Haddad, C.F.B.; de Carvalho-e-Silva, A.M.P.T.; Grant, T. Life on the Edge: Tadpoles of Cycloramphidae (Amphibia; Anura), Anatomy, Systematics, Functional Morphology, and Comments on the Evolution of Semiterrestrial Tadpoles. *Journal of Zoological Systematics and Evolutionary Research* **2021**, 59, 1297–1321, doi:10.1111/jzs.12483.
71. Colaço, G.; Batista, M.; Limp, G.; da Silva, H.R. The Tadpole of an Insular Population of *Cycloramphus Boraceiensis* Heyer, 1983 (Anura: Cycloramphidae) with a Review of Larval Descriptions for Species in the Genus. *Papeis Avulsos de Zoologia* **2021**, 61, doi:10.11606/1807-0205/2021.61.48.
72. Verdade, V.K.; Almeida-Silva, D.; Rodrigues, M.T. The Endotrophic Nidicolous Tadpole of *Cycloramphus Eleutherodactylus* (Miranda-Ribeiro) (Anura: Cycloramphidae). *Zootaxa* **2023**, 5254, 287–294, doi:10.11646/zootaxa.5254.2.8.
73. Wassersug, R.J.; Heyer, W.R. Morphological Correlates of Subaerial Existence in Leptodactylid Tadpoles Associated with Flowing Water. *Canadian Journal of Zoology* **1983**, 61, 761–769, doi:10.1139/z83-101.
74. Da Silva, H.R.; Oüvernay, D. A New Species of Stream-Dwelling Frog of the Genus *Cycloramphus* (Anura, Cycloramphidae) from the State of Rio de Janeiro, Brazil. *Zootaxa* **2012**, 49–60, doi:10.11646/zootaxa.3407.1.4.
75. Lima, A.M.X.; Garey, M.V.; Noleto, R.B.; Verdade, V.K. Natural History of the Lutz's Frog *Cycloramphus Lutzorum* Heyer, 1983 (Anura: Cycloramphidae) in the Brazilian Atlantic Forest: Description of the Advertisement Call, Tadpole, and Karyotype. *Journal of Herpetology* **2010**, 44, 360–371, doi:10.1670/08-185.1.
76. Nunes-De-Almeida, C.H.L.; Zamudio, K.R.; Toledo, L.F. The Semiterrestrial Tadpole of *Cycloramphus Rhyakonastes* Heyer, 1983 (Anura, Cycloramphidae). *Journal of Herpetology* **2016**, 50, 289–294, doi:10.1670/14-117.
77. Heyer, W.R.; Crombie, R.I. Natural History Notes on *Craspedoglossa Stejnegeri* and *Thoropa Petropolitana* (Amphibia: Salientia, Leptodactylidae). *Journal of the Washington Academy of Sciences* **1979**, 69, 17–20.
78. Lavilla, E.O. Condrocráneo y Esqueleto Visceral En Larvas de *Cycloramphus Stejnegeri* (Leptodactylidae). *Amphibia-Reptilia* **1991**, 12, 33–38.
79. Heyer, W.R. Notes on the Frog Genus *Cycloramphus* (Amphibia: Leptodactylidae), with Descriptions of Two New Species. *Proceedings of the Biological Society of Washington* **1983**, 96, 548–559.
80. Nuñez, J.J.; Rabanal, F.E.; Formas, J.R. Description of a New Species of *Eupsophus* (Amphibia: Neobatrachia) from the Valdivian Coastal Range, Southern Chile: An Integrative Taxonomic Approach. *Zootaxa* **2012**, 53–68, doi:10.11646/zootaxa.3305.1.3.
81. Vera Candioti, M.F.; Úbeda, C.; Lavilla, E.O. Morphology and Metamorphosis of *Eupsophus Calcaratus* Tadpoles (Anura: Leptodactylidae). *Journal of Morphology* **2005**, 264, 161–177, doi:10.1002/jmor.10320.
82. Nuñez, J.J.; Úbeda, C.A. The Tadpole of *Eupsophus Nahuelbutensis* (Anura: Neobatrachia): External Morphology, Chondrocranium, and Comments on Its Natural History. *Zootaxa* **2009**, 2126, 58–68.



83. Formas, J.R.; Vera, M.I. The Status of Two Chilean Frogs of the Genus *Eupsophus* (Anura: Leptodactylidae). *Proceedings of the Biological Society of Washington* **1982**, *95*, 594–601.
84. Formas, J.R. The Tadpole of *Eupsophus Calcaratus* in Southern Chile. *Journal of Herpetology* **2009**, *23*, 195–197.
85. Formas, J.R. A New Species of *Eupsophus* (Amphibia: Anura: Leptodactylidae) from Southern Chile. *Proceedings of the Biological Society of Washington* **1989**, *102*, 568–576.
86. Vera Candiotti, M.F.; Nuñez, J.J.; Úbeda, C. Development of the Nidicolous Tadpoles of *Eupsophus Emiliopugini* (Anura: Cycloramphidae) until Metamorphosis, with Comments on Systematic Relationships of the Species and Its Endotrophic Developmental Mode. *Acta Zoologica* **2011**, *92*, 27–45, doi:10.1111/j.1463-6395.2010.00448.x.
87. Ortiz, J.C.; Vidal, H.I. Una Nueva Especie de Leptodactylidae (*Eupsophus*) de La Cordillera de Nahuelbuta (Chile). *Acta Zoológica Lilloana* **1991**, *41*, 75–79.
88. Formas, J.R.; Pugín, E. Tadpoles of *Hylorina Sylvatica*, *Eupsophus Vittatus*, and *Bufo Rubropunctatus* in Southern Chile. *Herpetologica* **1978**, *34*, 355–358.
89. Cárdenas-Rojas, D.R.; Veloso, A.; De Sá, R.O. The Tadpole of *Eupsophus Queulensis* (Anura, Cycloramphidae). *Alytes* **2007**, *25*, 45–54.
90. Ibarra-Vidal, H.; Ortiz, J.C.; Torres-Pérez, F. *Eupsophus Septentrionalis* n. Sp. a New Leptodactulid Amphibian from Central Chile. *Boletín de la Sociedad de Biología de Concepción* **2004**, *75*, 91–102.
91. Formas, R. The Tadpole of *Eupsophus Vertebralis* (Anura: Leptodactylidae). *Herpetologica* **1992**, *48*, 115–119.
92. Pombal, J.P.; Feio, R.N.; Haddad, C.F.B. A New Species of Torrent Frog Genus *Hylodes* (Anura: Leptodactylidae) from Southeastern Brazil. *Herpetologica* **2002**, *58*, 462–471, doi:10.1655/0018-0831(2002)058[0462:ANSOTF]2.0.CO;2.
93. Montesinos, R.; Carvalho, A.L.G.; Silva, H.R.D.; Anganoycriollo, M.; Dias, P.H.D.S. The Tadpole of *Hylodes Perere* Silva & Benmaman 2008 (Anura: Hylodidae). *Zootaxa* **2022**, *5219*, 388–396, doi:10.11646/zootaxa.5219.4.6.
94. Canedo, C. Revisão Taxonômica de *Hylodes Fitzinger*, 1826 (Anura, Hylodidae), Universidade Federal do Rio de Janeiro, 2008.
95. Bokermann, W.C.A. Girinos de Anfíbios Brasileiros - 2 (Amphibia, Salientia). *Rev. Brasil. Biol.* **1963**, *23*, 349–353.
96. Almeida-Silva, D.; Hipolito, M.; Martins, A.M.C.R.P. da F.; Batista, B.L.; Pedron, T.; Dias, G.M.; Verdade, V.K. Frog Hepatic Health and Metal Pollution: An Assemblage-Level Approach. *SSRN - preprint* **2024**, 1–52, doi:http://dx.doi.org/10.2139/ssrn.4580718.
97. Nogueira-Costa, P.; Silva-Soares, T.; Weber, L.N.; Carvalho-E-silva, A.M.P.T.D. Redescription of Tadpole of the Hyloid Frog *Hylodes Asper* (Müller, 1924). *Zootaxa* **2010**, *68*, 65–68, doi:10.11646/zootaxa.2521.1.5.
98. Pirani, R.M.; Pezzuti, T.L.; Motta, A.P.; Feio, R.N. The Tadpole of *Hylodes Babax* Heyer, 1982 (Amphibia, Anura, Hylodidae). *Zootaxa* **2011**, *1930*, 64–68, doi:10.11646/zootaxa.2800.1.5.
99. Heyer, W.R. Two New Species of the Frog Genus *Hylodes* from Caparaó, Minas Gerais, Brasil (Amphibia: Leptodactylidae). *Proceedings of the Biological Society of Washington* **1982**, *95*, 377–385.

100. Malagoli, L.R.; Sá, F.P. de; Canedo, C.; Haddad, C.F.B. The Tadpole of *Hylodes Caete* (Anura: Hylodidae), an Endemic Atlantic Rainforest Torrent Frog of Brazil. *Zootaxa* **2020**, *4852*, 594–599.
101. Malagoli, L.R.; De Sá, F.P.; Canedo, C.; Haddad, C.F.B. A New Species of *Hylodes* (Anura, Hylodidae) from Serra Do Mar, Southeastern Brazil: The Fourth with Nuptial Thumb Tubercles. *Herpetologica* **2017**, *73*, 136–147, doi:10.1655/HERPETOLOGICA-D-16-00069.
102. Nogueira-Costa, P.; Siqueira, C.C.; Vrcibradic, D.; Weber, L.N.; Rocha, C.F.D. The Tadpole of the Hylodid Frog *Hylodes Charadranaetes* Heyer and Cocroft, 1986. *Zootaxa* **2010**, 65–68, doi:10.11646/zootaxa.2680.1.6.
103. Pavan, D.; Narvaes, P.; Rodrigues, M.T. A New Species of Leptodactylid Frog from the Atlantic Forests of Southeastern Brazil with Notes on the Status and the Speciation of the *Hylodes* Species Groups. *Papeis Avulsos de Zoologia* **2001**, *41*, 407–425.
104. Weber, L.N.; Caramaschi, U. A Survey of the Internal Oral Morphology in Larvae of the Genus *Hylodes* Fitzinger, 1826 (Amphibia, Anura, Hylodidae). *Zootaxa* **2013**, *3635*, 557–568, doi:10.11646/zootaxa.3635.5.5.
105. Canedo, C.; Pombal, J.P. Two New Species of Torrent Frog of the Genus *Hylodes* (Anura, Hylodidae) with Nuptial Thumb Tubercles. *Herpetologica* **2007**, *63*, 224–235, doi:10.1655/0018-0831(2007)63[224:TNSOTF]2.0.CO;2.
106. Laia, R.C.; Fatorelli, P.; Hatano, F.H.; Duarte Rocha, C.F. Tadpole of *Hylodes Fredi* (Anura; Hylodidae), a Frog Endemic to an Atlantic Forest Island (Ilha Grande, Rio de Janeiro State), Brazil. *Zootaxa* **2010**, 62–64, doi:10.11646/zootaxa.2640.1.5.
107. Nogueira-Costa, T.R.; Lingnau, R.; Toledo, L.F. The Tadpole of the Brazilian Torrent Frog *Hylodes Heyeri* (Anura; Hylodidae). *Zootaxa* **2009**, *68*, 66–68, doi:10.11646/zootaxa.2222.1.6.
108. Haddad, C.F.B.; Pombal, J.P.; Bastos, R.P. New Species of *Hylodes* from the Atlantic Forest of Brazil (Amphibia: Leptodactylidae). *Copeia* **1996**, *1996*, 965–969, doi:10.2307/1447659.
109. Lutz, A. Contribution to the Knowledge of Brazilian Batrachians: Taxonomy and Biology of the Elosiinae. *Memórias do Instituto Oswaldo Cruz* **1930**, XXIV, 223–244.
110. de Sá, F.P.; Canedo, C.; Lyra, M.L.; Haddad, C.F.B. A New Species of *Hylodes* (Anura, Hylodidae) and Its Secretive Underwater Breeding. *Herpetologica* **2015**, *71*, 58–71.
111. Gomes, F.B.R.; Provete, D.B.; Martins, I.A. Description of the Tadpole of *Hylodes Magalhaesi* (Bokermann, 1964) (Anura: Hylodidae). *Journal of Herpetology* **2012**, *46*, 614–619, doi:10.1670/11-039.
112. Bokermann, W.C.A. Una Nueva Especies de Elosia de La Serra Da Mantiqueira, Brasil. *Neotropica* **1964**, *10*, 102–107.
113. Nogueira-Costa, P.; Wachlevski, M. The Tadpole of *Hylodes Meridionalis* (Mertens, 1927), a Lotic Stream Anura from the Atlantic Rainforest of Brazil. *Zootaxa* **2015**, *4032*, 199–202, doi:10.11646/zootaxa.4032.2.5.
114. Lingnau, R.; Zank, C.; Colombo, P.; Kwet, A. Vocalization of *Hylodes Meridionalis* (Mertens 1927) (Anura, Hylodidae) in Rio Grande Do Sul, Brazil, with Comments on Nocturnal Calling in the Family Hylodidae. *Studies on Neotropical Fauna and Environment* **2013**, *48*, 76–80, doi:10.1080/01650521.2013.788285.

115. Wogel, H.; Abrunhosa, P.A.; Weber, L.N. The Tadpole, Vocalizations and Visual Displays of *Hylodes Nasus* (Anura: Leptodactylidae). *Amphibia Reptilia* **2004**, *25*, 219–227, doi:10.1163/1568538041231184.
116. Machado, A.D.O.; Winck, G.; Dorigo, T.A.; Rocha, C.F.D. Diet, Diel Activity Pattern, Habitat Use, and Reproductive Effort of *Hylodes Nasus* (Anura: Hylodidae) in One of the World's Largest Urban Parks (Tijuca National Park), Southeastern Brazil. *South American Journal of Herpetology* **2016**, *11*, 127–135, doi:10.2994/SAJH-D-16-00004.1.
117. Bilate, M.; Nogueira-Costa, P.; Weber, L.N. The Tadpole of the Hylodid Frog *Hylodes Ornatus* (Bokermann, 1967), Including Chondrocranium Description, and Advertisement Call. *Zootaxa* **2012**, *66*, 60–66, doi:10.11646/zootaxa.3249.1.6.
118. Bokermann, W.C.A. Una Nueva Especie de *Elosia* de Itatiaia, Brasil (Amphibia, Leptodactylidae). *Neotropica* **1967**, *13*, 135–137.
119. Sazima, I.; Bokermann, W. Anfíbios Da Serra Do Cipó, Minas Gerais, Brasil. 5: *Hylodes Otavioi* Sp. n. (Anura, Leptodactylidae). *Revista Brasileira de Biologia* **1982**, *42*, 767–771.
120. Silva, H.R. da; Benmaman, P. Uma Nova Espécie de *Hylodes Fitzinger* Da Serra Da Mantiqueira, Minas Gerais, Brasil (Anura: Hylodidae). *Revista Brasileira de Zoologia* **2008**, *25*, 89–99, doi:10.1590/S0101-81752008000100013.
121. Haddad, C.F.B.; Garcia, P.C.A.; Jr, J.P.P. Redescritção de *Hylodes Perplicatus* (Miranda-Ribeiro, 1926) (Amphibia, Anura, Leptodactylidae). *Arquivos do Museu Nacional, Rio de Janeiro* **2003**, *61*, 245–254.
122. Menegucci, R.C.; Muscat, E.; Tanaka, R.M.; Stuginski, D. Predation on *Hylodes Phyllodes* (Anura: Hylodidae) by the Harvestman *Heteromitobates Discolor* (Arachnida: Opiliones). *Phyllomedusa* **2020**, *19*, 121–124, doi:10.11606/issn.2316-9079.v19i1p121-124.
123. Alencar, L.R.V.; Gaiarsa, P.; Gennari, D.; Martins, M. *Hylodes Phyllodes* (Amphibia, Anura, Hylodidae): Nocturnal Calling Behavior. *Herpetologia Brasileira* **2012**, *1*, 82–83.
124. Nogueira-Costa, P.; Weber, L.N.; Wogel, H.; Salles, R.D.O.L.; Bilate, M. A Description of the Tadpoles of *Hylodes Pipilans* Canedo and Pombal, 2007: An Endemic Species of the Atlantic Forest of Brazil. *Herpetological Conservation and Biology* **2019**, *14*, 370–379.
125. Carmo, L.F.; Folly, M.; Malagoli, L.R. An Update of the Geographical Distribution of *Hylodes Pipilans* (Canedo & Pombal, 2007), an Endemic Torrent Frog of the Brazilian Atlantic Forest, with Comments on Its Conservation. *Neotropical Biodiversity* **2022**, *8*, 131–135, doi:10.1080/23766808.2022.2049171.
126. Haddad, C.F.B.; Pombal Jr., J.P. A New Species of *Hylodes* from Southeastern Brazil (Amphibia: Leptodactylidae). *Herpetologica* **1995**, *51*, 279–286.
127. Nascimento, L.B.; Pombal, J.P.; Haddad, C.F.B. A New Frog of the Genus *Hylodes* (Amphibia: Leptodactylidae) from Minas Gerais, Brazil. *Journal of Zoology* **2001**, *254*, 421–428, doi:10.1017/S0952836901000917.
128. Úbeda, C.; Moncada, M.; Jara, F. Fenología Del Ciclo de Vida de La Rana Esmeralda *Hylorina Sylvatica* Bell 1843 (Anura, Batrachylidae) En Un Humedal Semipermanente Del Noroeste de La Patagonia Argentina. *Boletín Chileno de Herpetología* **2022**, *9*, 1–11.
129. Guerra, V.; Lingnau, R.; Barreto, B. de S.; Kwet, A.; Bastos, R.P. Vocalizations of *Limnomedusa Macroglossa* (Amphibia: Anura: Alsodidae). *Salamandra* **2018**, *54*, 97–100.

130. Alcalde, L.; Blotto, B.L. Chondrocranium, Cranial Muscles and Buccopharyngeal Morphology on Tadpoles of the Controversial Leptodactylid Frog *Limnomedusa Macroglossa* (Anura: Leptodactylidae). *Amphibia Reptilia* **2006**, *27*, 241–253, doi:10.1163/15685380677239959.
131. da Silva, D. das N.; da Rosa, F.C.B.; de Carvalho-E-Silva, A.M.P.T. Ontogeny and Behavioural Aspects of the Tadpoles of *Megaelosia Goeldii* (Baumann, 1912) (Amphibia, Anura, Hylodidae). *Herpetology Notes* **2018**, *11*, 629–639.
132. Sichieri, G.; Moroti, M. de T.; Costa, F.R.; Muscat, E.; Nunes, I. Redescription of the Tadpole of Rare Giant Torrent Frog *Megaelosia Boticariana* Giarretta & Aguiar, 1998 (Anura, Hylodidae) with Comments on Natural History. *Zootaxa* **2020**, *4896*, 140–144, doi:10.11646/zootaxa.4896.1.9.
133. Giarretta, A.A.; Bokermann, W.C.A.; Haddad, C.F.B. A Review of the Genus *Megaelosia* (Anura: Leptodactylidae) with a Description of a New Species. *Journal of Herpetology* **1993**, *27*, 276, doi:10.2307/1565148.
134. Pombal, J.P.; Prado, G.M.; Canedo, C. A New Species of Giant Torrent Frog, Genus *Megaelosia*, from the Atlantic Rain Forest of Espírito Santo, Brazil (Amphibia: Leptodactylidae). *Journal of Herpetology* **2003**, *37*, 453–460, doi:10.1670/220-01a.
135. Giarretta, A.A.; Aguiar Jr., O.A. A New Species of *Megaelosia* from the Mantiqueira Range, Southeastern Brazil. *Journal of Herpetology* **1998**, *32*, 80–83, doi:10.2307/1565483.
136. Nogueira-Costa, P.; Almeida-Santos, P.; Cruz, C.A.G.; Caramaschi, U. The Giant Tadpoles of *Megaelosia Jordanensis* (Heyer, 1983). *Zootaxa* **2012**, 86–88, doi:10.11646/zootaxa.3581.1.4.
137. Verdade, V.K.; Rodrigues, M.T. On the Identity of *Cycloramphus Jordanensis* Heyer, 1983 (Anura: Cycloramphidae). *Herpetologica* **2008**, *64*, 452–457, doi:10.1655/08-011R2.1.
138. De Sá, F.P.; Condez, T.H.; Lyra, M.L.; Haddad, C.F.B.; Malagoli, L.R. Unveiling the Diversity of Giant Neotropical Torrent Frogs (Hylodidae): Phylogenetic Relationships, Morphology, and the Description of Two New Species. *Systematics and Biodiversity* **2022**, *20*, 1–31, doi:10.1080/14772000.2022.2039318.
139. Bokermann, W.C.A. Notas Sobre as Espécies de *Thoropa* Fitzinger (Amphibia, Leptodactylidae). *Anais da Academia Brasileira de Ciências. Rio de Janeiro* **1965**, *37*, 525–537.
140. Sabbag, A.F.; Lyra, M.L.; Zamudio, K.R.; Haddad, C.F.B.; Feio, R.N.; Leite, F.S.F.; Gasparini, J.L.; Brasileiro, C.A. Molecular Phylogeny of Neotropical Rock Frogs Reveals a Long History of Vicariant Diversification in the Atlantic Forest. *Molecular Phylogenetics and Evolution* **2018**, *122*, 142–156, doi:10.1016/j.ympev.2018.01.017.
141. Assis, C.L.; Lacerda, J.V.A.; Guimares, C.S.; Peixoto, M.A.; Luna, M.C.; Feio, R.N. A New Species of *Thoropa* Cope, 1865 (Anura, Cycloramphidae) from the Serra Da Mantiqueira, Southeast Brazil. *Zootaxa* **2021**, *4995*, 505–522, doi:10.11646/zootaxa.4995.3.6.
142. Caramaschi, U.; Sazima, I. Uma Nova Espécie de *Thoropa* Da Serra Do Cipó, Minas Gerais, Brasil (Amphibia, Leptodactylidae). *Revista Brasileira de Zoologia* **1984**, *2*, 139–146.
143. Santos, D.L.; Feio, R.N.; Nomura, F. Morphological Characterization and Taxonomic Key for Tadpoles of Brazilian Cerrado. *Biota Neotropica* **2023**, *23*, doi:10.1590/1676-0611-BN-2023-1486.

144. Feio, R.N.; Napoli, M.F.; Caramaschi, U. Considerações Taxonômicas Sobre Thoropa Miliaris (Spix, 1824), Com Revalidação e Redescrição de Thoropa Taophora (Miranda-Ribeiro, 1923) (Amphibia, Anura, Leptodactylidae). *Arquivos do Museu Nacional: Zoologia* **2006**, 64, 41–60.
145. Cocroft, R.B.; Heyer, W.R. Notes on the Frog Genus Thoropa (Amphibia: Leptodactylidae) with a Description of a New Species (Thoropa Saxatilis). *Proceedings of the Biological Society of Washington* **1988**, 101, 209–220.
146. Moura, P.H.A.G.; Alves, S.J.D.R.; Sousa, D.D.G.D.S.E.; Correa, C.N.; Nunes, I. Redescription of the Tadpole of Thoropa Taophora (Miranda-Ribeiro) (Anura: Cycloramphidae). *Zootaxa* **2019**, 4656, doi:10.11646/zootaxa.4656.2.14.
147. Almeida-Silva, D.; Rocha-Barros, V.C. de O.; Ferreira, R.B.; Verdade, V.K. The Tadpole of Zachaenus Carvalhoi Izecksohn, 1983 (Anura: Cycloramphidae). *Zootaxa* **2019**, 4668, 145–147, doi:10.11646/zootaxa.4668.1.11.
148. Lutz, B. Biologia e Taxonomia de Zachaenus Parvulus. *Boletim do Museu Nacional de Zoologia* **1944**, 17, 1–65.
