# Supplementary material for: Shape Evolution in Two Acts: Morphological Diversity of Larval and Adult Neoaustraranan Frogs
Source: Animals (Basel). 2024 May 8;14(10):1406. doi: 10.3390/ani14101406 (PMC11117230; doi:10.3390/ani14101406)
Supplement: Supplementary file 1 [file animals-14-01406-s001.zip]

Archive with 8 entries (8 files):
- SuppFigS1.pdf
- SuppFigS2.pdf
- SuppFigS3.pdf
- SuppFigS4.pdf
- SuppFigS5.pdf
- TableS1.pdf
- TableS2.pdf
- TableS3.pdf
